# Supplementary material for: Fe and P dual-doped nickel carbonate hydroxide/carbon nanotube hybrid electrocatalysts for an efficient oxygen evolution reaction
Source: Royal Society of Chemistry journal article supplement (doi:10.1039/d2nr00184e), 2022-01-01
Supplement: d2nr00184e1.pdf [file d2nr00184e1.pdf]

## Electronic Supplementary Information

**Fe and P dual-doped nickel carbonate hydroxide/carbon nanotube hybrid  
electrocatalyst for efficient oxygen evolution reaction**

*Qing Ye<sup>1</sup>, Jiang Liu<sup>1</sup>, Lu Lin, Min Sun, Yufeng Wang and Yongliang Cheng\**

Key Laboratory of Synthetic and Natural Functional Molecule of the Ministry of Education, College of Chemistry and Materials Science, Northwest University, Xi'an 710069, China

[1] These authors contributed equally to this work

\* Corresponding authors: [ylcheng@nwu.edu.cn](mailto:ylcheng@nwu.edu.cn) (Y.L. Cheng)

## Experimental section

### Calculation methods

All calculations were performed with spin-polarization density functional theory (DFT). The generalized gradient approximation (GGA) using the Perdew-Burke-Ernzerhof (PBE) formulation was employed to describe the electron exchange correlation interaction. The ionic cores were described by the projected augmented wave (PAW) potentials. The plane wave basis set was 500 eV. Partial occupancies of the Kohn–Sham orbitals were allowed using the Gaussian smearing method and a width of 0.05 eV. The convergence criteria of electronic energy and geometry optimization were set to  $10^{-4}$  eV and 0.05 eV Å<sup>-1</sup>, respectively. The vacuum spacing in a direction perpendicular to the plane of the structure is 16 Å. The Brillouin zone integration is performed using 3×3×1 Monkhorst-Pack k-point. The U correction for Ni and Fe atoms was set as 3.75 and 4.34 eV, respectively. Additionally, the density of states was calculated using the 4×4×2 Monkhorst-Pack k-point.

The free energy was calculated using the equation:

$$G = E + ZPE - TS$$

Where,  $G$ ,  $E$ ,  $ZPE$  and  $TS$  represent the free energy, total energy from DFT calculations, zero point energy and entropic contributions, respectively.

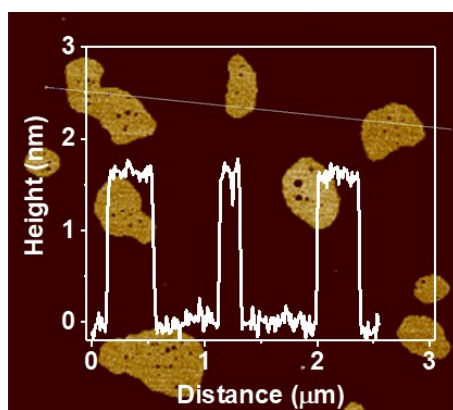

**Fig. S1.** AFM image and corresponding line-scan profiles of Fe, P-NiCH/CNTs.

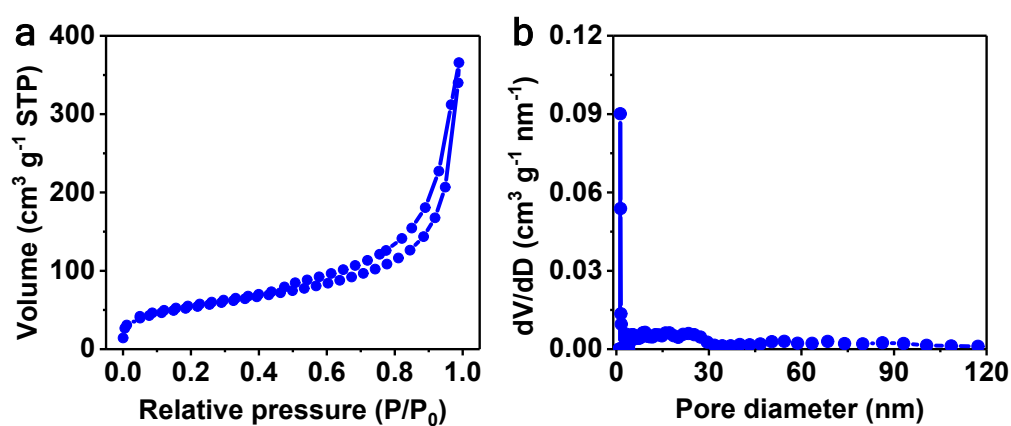

**Fig. S2.** (a)  $N_2$  adsorption-desorption curves and (b) corresponding pore size distribution curves of Fe, P-NiCH/CNTs.

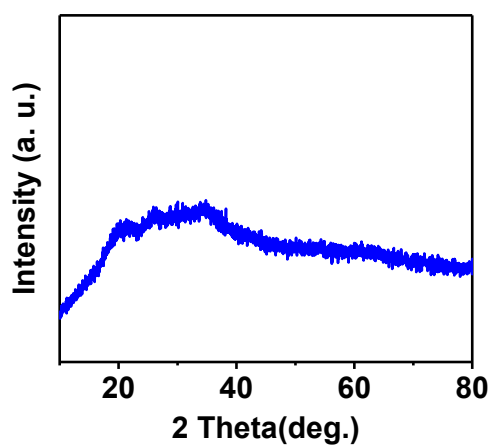

**Fig. S3.** XRD patterns of Fe, P-NiCH/CNTs.

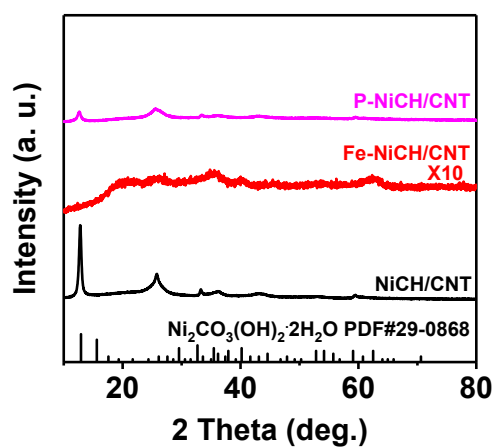

**Fig. S4.** XRD patterns of NiCH/CNTs, Fe–NiCH/CNTs and P–NiCH/CNTs.

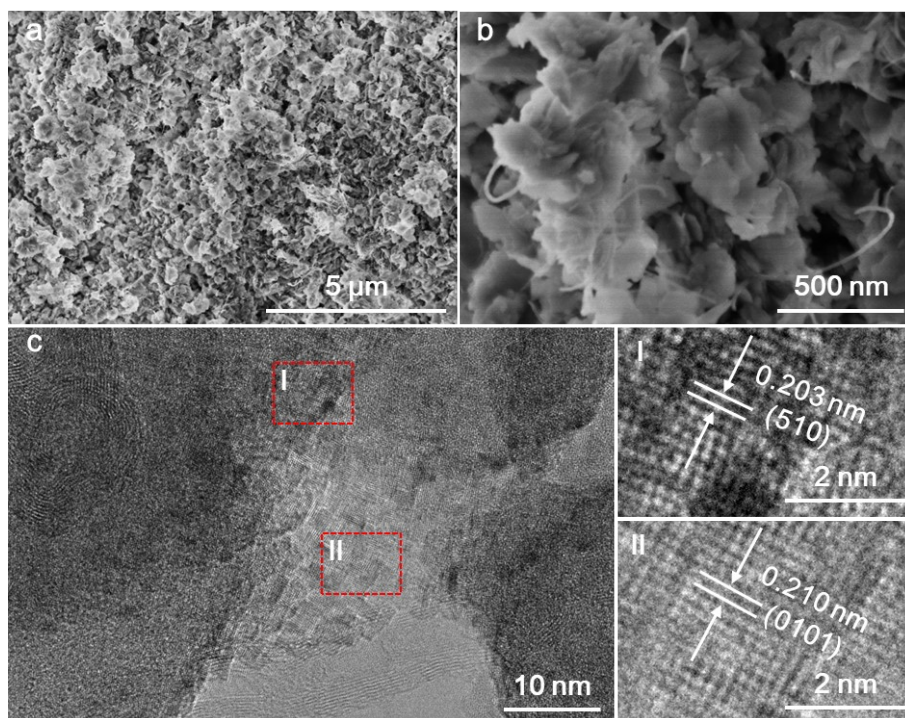

**Fig. S5.** (a) Low-, (b) high-magnification SEM images and (c) HRTEM image of NiCH/CNTs.

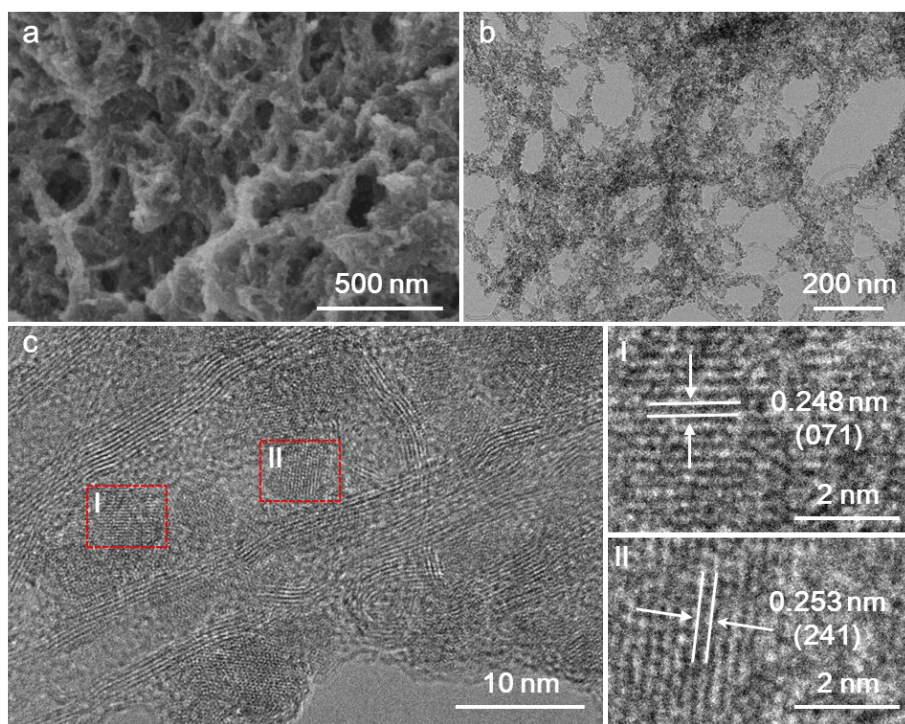

**Fig. S6.** (a) Low-, (b) high-magnification SEM images and (c) HRTEM image of Fe-NiCH/CNTs.

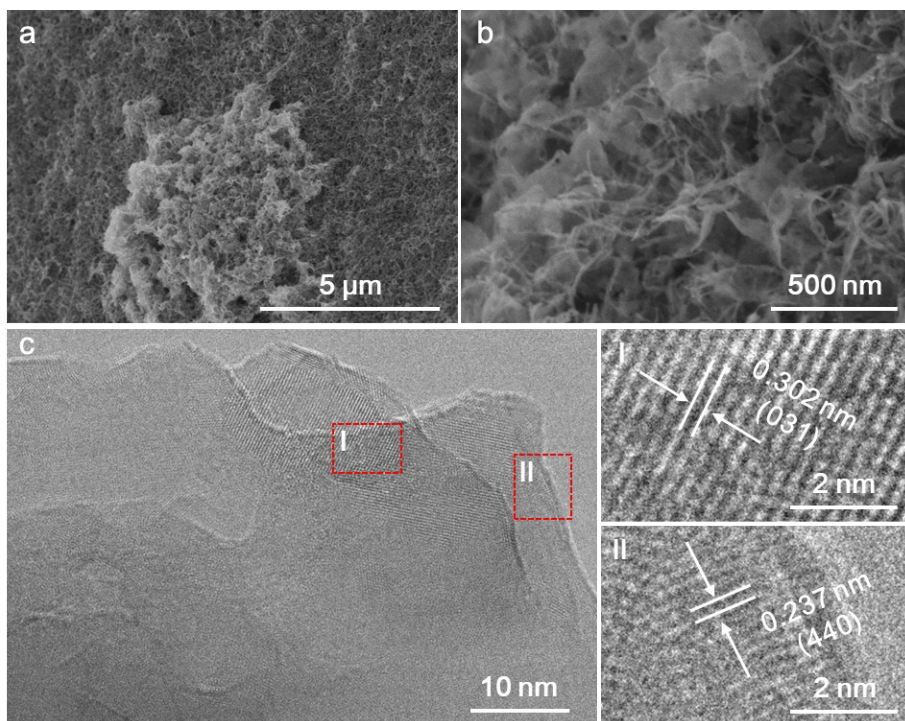

**Fig. S7.** (a) Low-, (b) high-magnification SEM images and (c) HRTEM image of P-NiCH/CNTs.



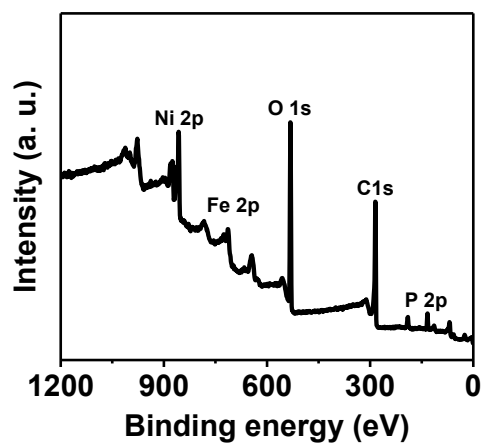

**Fig. S8.** XPS survey spectra of Fe, P-NiCH/CNTs.

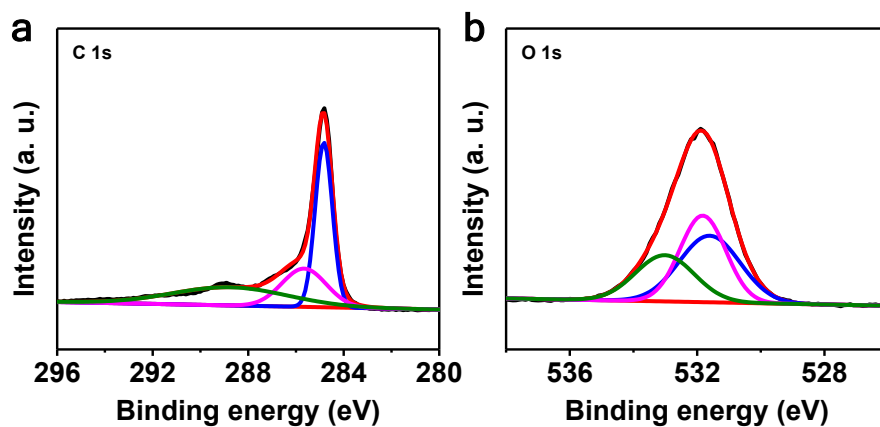

**Fig. S9.** (a) C 1s and (b) O 1s spectra of Fe, P-NiCH/CNTs.

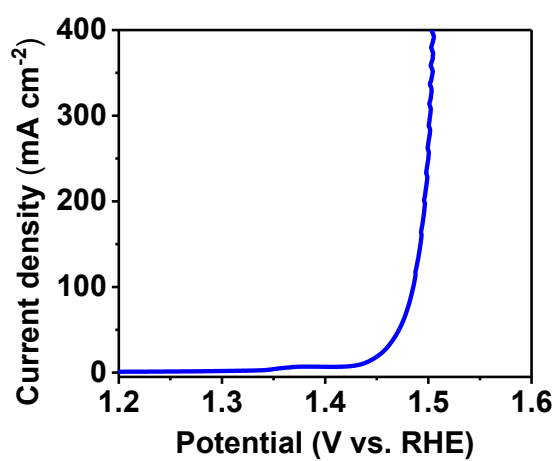

**Fig. S10.** LSV curves of Fe, P-NiCH/CNTs coated on the Ni foam surface.

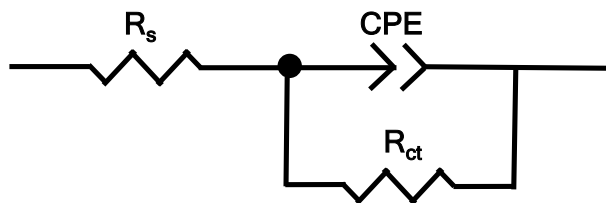

**Fig. S11.** The equivalent circuit model of EIS analysis of all samples.

The equivalent circuit is consisted by a parallel combination of ( $R_{ct}$ , CPE) element in series with  $R_s$ . The CPE represents as the double layer capacitor from the catalyst/support and catalyst solution.  $R_s$  and  $R_{ct}$  is the uncompensated solution resistance and charge transfer resistance arisen from the relevant electro-chemical oxidation, respectively.

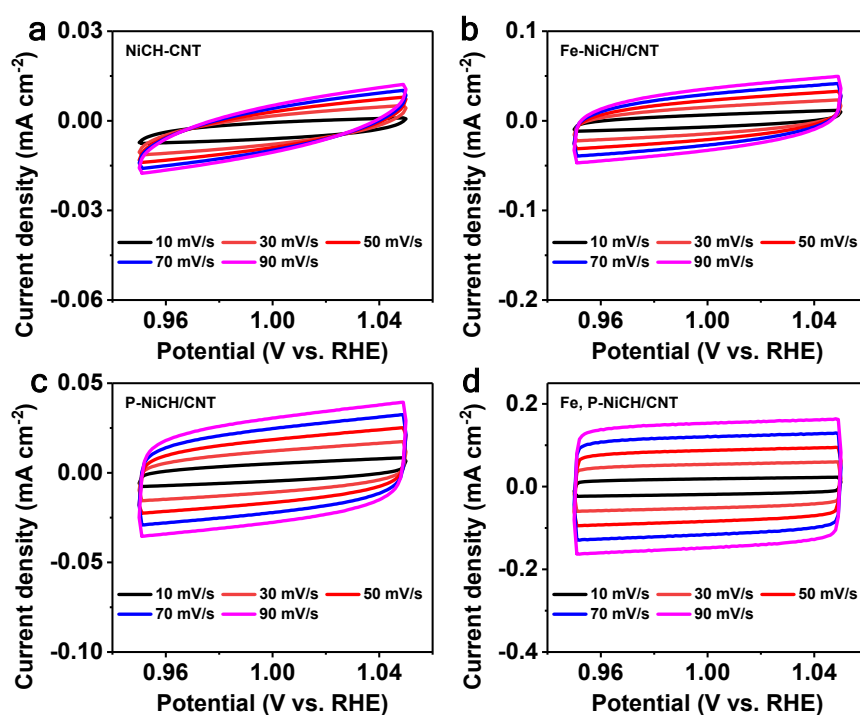

**Fig. S12.** CV curves of (a) NiCH/CNTs, (b) Fe-NiCH/CNTs, (c) P-NiCH/CNTs and (d) Fe, P-NiCH/CNTs at different scan rates.

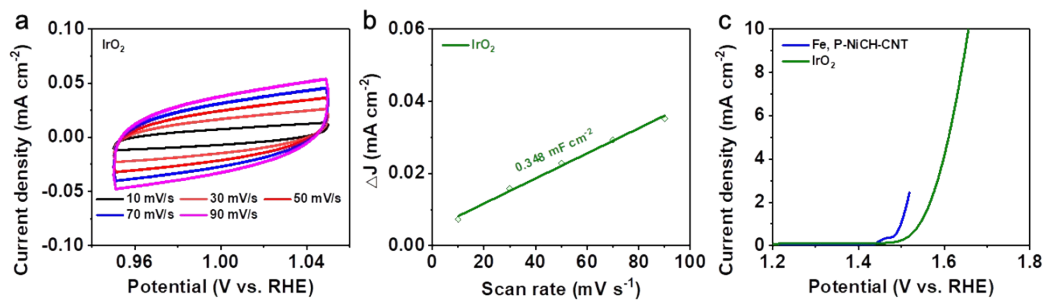

**Fig. S13.** (a) CV curves, (b) (d)  $C_{dl}$ , (e) ECSA-normalized LSV curves of  $\text{IrO}_2$ .

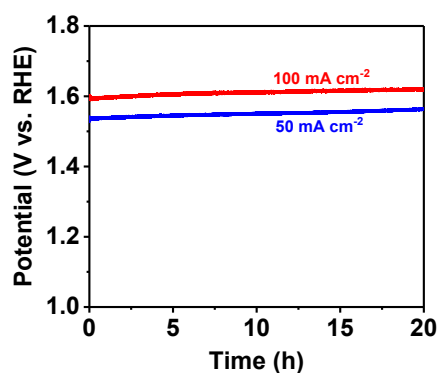

**Fig. S14.** The chronopotentiometry test curves of the Fe, P-NiCH/CNTs at 50 and  $100 \text{ mA cm}^{-2}$ .

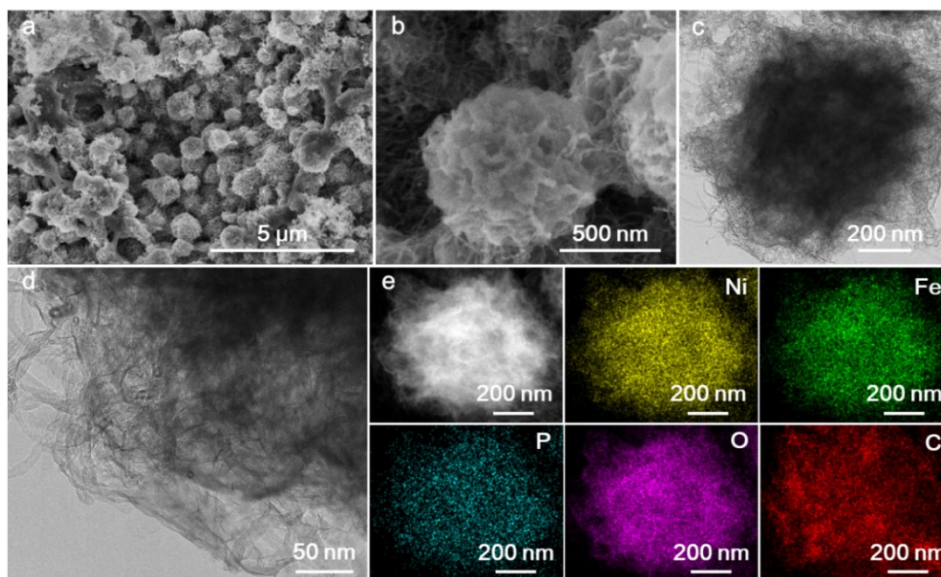

**Fig. S15.** Structural characterization of Fe, P-NiCH/CNTs after long-term OER measurement. (a) Low-, (b) high-magnification SEM images, (c) low-, (d) high-magnification TEM images and (e) HAADF-STEM image and corresponding element mapping.



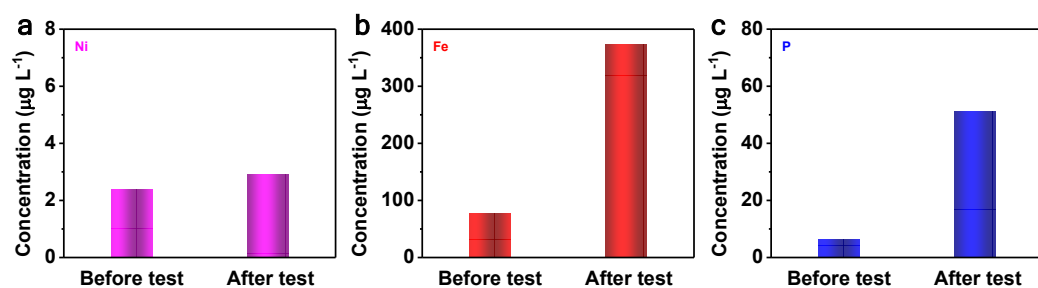

**Fig. S16.** Comparison of (a) Ni, (b) Fe and (c) P concentration in electrolyte before and after long-term OER measurement.

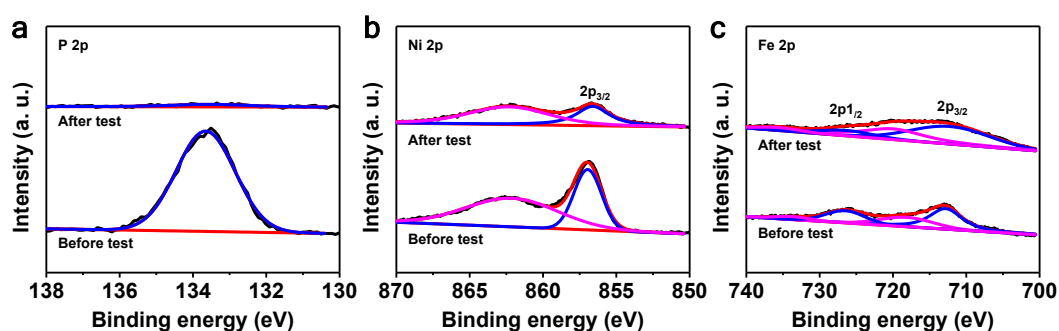

**Fig. S17.** Comparison of (a) P 2p, (b) Ni 2p and Fe 2p spectra of Fe, P-NiCH/CNTs before and after long-term OER test.

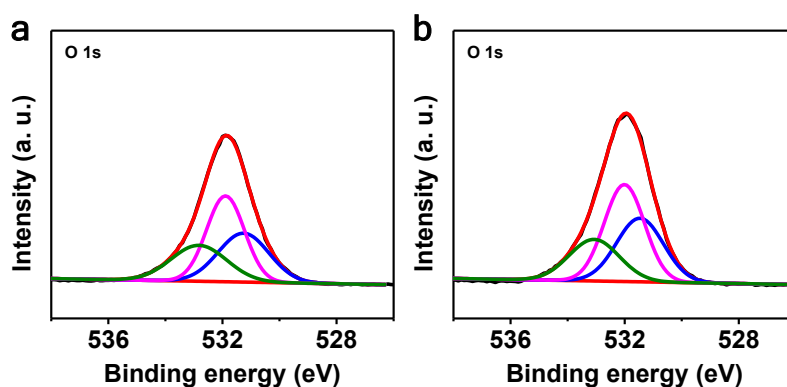

**Fig. S18.** O 1s spectra of Fe, P-NiCH/CNTs with higher (a) Fe and (b) P doping dosage.

**Table S1** Comparison of OER activity of Fe, P–NiCH/CNTs with other reported carbonate hydroxides and nickel based OER electrocatalysts

| Electrocatalysts                                                      | Current density<br>(mA cm <sup>-2</sup> ) | Overpotential<br>(mV) | References |
|-----------------------------------------------------------------------|-------------------------------------------|-----------------------|------------|
| Fe, P–NiCH/CNTs                                                       | 20                                        | 222                   | This work  |
| Ni <sub>x</sub> Fe <sub>y</sub> S/CH                                  | 20                                        | 261                   | [1]        |
| FCCH/NF                                                               | 10                                        | 228                   | [2]        |
| NiCoCHH/CC                                                            | 10                                        | 238                   | [3]        |
| NiFeHCH                                                               | 20                                        | 250                   | [4]        |
| C@NFeCoCH/CC                                                          | 10                                        | 235                   | [5]        |
| CoCO <sub>3</sub> PNSs                                                | 10                                        | 310                   | [6]        |
| Fe <sub>0.25</sub> –CoMoCH/NF                                         | 10                                        | 232                   | [7]        |
| Co <sub>0.95</sub> Mn <sub>0.05</sub> CO <sub>3</sub> /GP             | 10                                        | 266                   | [8]        |
| (Ru–Ni)O <sub>x</sub> /NF                                             | 10                                        | 237.2                 | [9]        |
| NiO–Ni CHNAs/CFC                                                      | 10                                        | 235                   | [10]       |
| NiO/NiFe <sub>2</sub> O <sub>4</sub> /NF                              | 10                                        | 290                   | [11]       |
| NiSe <sub>2</sub> /FeSe <sub>2</sub>                                  | 10                                        | 256                   | [12]       |
| Ni–Fe LDH<br>nanocages                                                | 20                                        | 246                   | [13]       |
| Ni <sub>3</sub> N/Ni@Ni <sub>3</sub> N                                | 20                                        | 229                   | [14]       |
| Co <sub>1.6</sub> Ni <sub>0.4</sub> P <sub>4</sub> O <sub>12</sub> –C | 10                                        | 230                   | [15]       |

**Table S2** EIS fitting parameters from equivalent circuits during OER process

| Samples          | R <sub>s</sub> /Ω | CPE/S s <sup>-n</sup> | n/0<n<1 | R <sub>ct</sub> /Ω   |
|------------------|-------------------|-----------------------|---------|----------------------|
| NiCH/CNTs        | 7.57              | 4.50×10 <sup>-6</sup> | 0.850   | 1.67×10 <sup>5</sup> |
| Fe–NiCH/CNTs     | 9.76              | 0.00285               | 0.664   | 664.9                |
| P–NiCH/CNTs      | 15.52             | 0.00343               | 0.916   | 295.9                |
| Fe, P –NiCH/CNTs | 10.12             | 0.00846               | 0.881   | 11.2                 |

## References

- 1 Y. Yang, X. Luan, X. Dai, X. Zhang, H. Qiao, H. Zhao, J. Yong, L. Yu, J. Han

- and J. Zhang, *Electrochim. Acta*, 2019, **309**, 57-64.
- 2 L. Hui, Y. Xue, D. Jia, H. Yu, C. Zhang and Y. Li, *Adv. Energy Mater.*, 2018, **8**, 1800175.
  - 3 K. Karthick, S. Subhashini, R. Kumar, S. Sethuram Markandaraj, M. M. Teepikha and S. Kundu, *Inorg. Chem.*, 2020, **59**, 16690-16702.
  - 4 K. Karthick, S. Anantharaj, S. R. Ede and S. Kundu, *Inorg. Chem.*, 2019, **58**, 1895-1904.
  - 5 M. Dai, H. Fan, G. Xu, M. Wang, S. Zhang, L. Lu and Y. Zhang, *J. Power Sources*, 2020, **450**, 227639.
  - 6 Y. Jia, Y.-N. Li, Z.-M. Wang, F.-M. Li, P.-J. Jin, S.-N. Li and Y. Chen, *Chem. Eng. J.*, 2021, **417**, 128066.
  - 7 M. Cai, X. Lu, Z. Zou, K. Guo, P. Xi and C. Xu, *ACS Sustain. Chem. Eng.*, 2019, **7**, 6161-6169.
  - 8 A. Karmakar and S. K. Srivastava, *ACS Appl. Energy Mater.*, 2020, **3**, 7335-7344.
  - 9 H. Zhang, Y. Lv, C. Chen, C. Lv, X. Wu, J. Guo and D. Jia, *Appl. Catal. B-Environ.*, 2021, **298**, 120611.
  - 10 Y. Lei, T. Xu, S. Ye, L. Zheng, P. Liao, W. Xiong, J. Hu, Y. Wang, J. Wang, X. Ren, C. He, Q. Zhang, J. Liu and X. Sun, *Appl. Catal. B-Environ.*, 2021, **285**, 119809.
  - 11 H. Zhong, G. Gao, X. Wang, H. Wu, S. Shen, W. Zuo, G. Cai, G. Wei, Y. Shi, D. Fu, C. Jiang, L.-W. Wang and F. Ren, *Small*, 2021, **17**, 2103501.
  - 12 S. Ni, H. N. Qu, Z. H. Xu, X. Y. Zhu, H. F. Xing, L. Wang, J. M. Yu, H. Z. Liu, C. M. Chen and L. R. Yang, *Appl. Catal. B-Environ.*, 2021, **299**, 120638.
  - 13 J. Zhang, L. Yu, Y. Chen, X. F. Lu, S. Gao and X. W. D. Lou, *Adv. Mater.*, 2020, **32**, e1906432.
  - 14 X. R. Gao, X. M. Liu, W. J. Zang, H. L. Dong, Y. J. Pang, Z. K. Kou, P. Y. Wang, Z. H. Pan, S. R. Wei, S. C. Mu and J. Wang, *Nano Energy*, 2020, **78**, 105355.
  - 15 Y. Li, Z. Wang, J. Hu, S. Li, Y. Du, X. Han and P. Xu, *Adv. Funct. Mater.*, 2020, **30**, 1910498.
